# Supplementary material for: Thymol-Modified Oleic and Linoleic Acids Encapsulated in Polymeric Nanoparticles: Enhanced Bioactivity, Stability, and Biomedical Potential
Source: MDPI journal article supplement (doi:10.3390/polym16010072), 2023-12-26
Supplement: s1 [file s1]

## Supplementary

# Thymol-Modified Oleic and Linoleic Acids Encapsulated in Polymeric Nanoparticles: Enhanced Bioactivity, Stability, and Biomedical Potential

Maria B. Sokol<sup>1,\*</sup>, Vera A. Sokhraneva<sup>2,3</sup>, Nataliya V. Groza<sup>2</sup>, Mariia R. Mollaeva<sup>1</sup>, Nikita G. Yabbarov<sup>1</sup>, Margarita V. Chirkina<sup>1</sup>, Anna A. Trufanova<sup>1</sup>, Vladimir I. Popenko<sup>3</sup>, Elena D. Nikolskaya<sup>1,\*</sup>

- <sup>1</sup> N.M. Emanuel Institute of biochemical physics of Russian academy of sciences, 119334, Moscow, Russia; mollaevamariia@gmail.com (M.R.M.); yabbarovng@gmail.com (N.G.Y.); chir.marg@mail.ru (M.V.C.); puzinoaa@gmail.com (A.A.T.)  
<sup>2</sup> N.A. Preobrazhensky Department of Chemistry and Technology of Biologically Active Compounds, Medicinal and Organic Chemistry, M.V. Lomonosov Institute of Fine Chemical Technologies, MIREA – Russian Technological University, 119571 Moscow, Russia; sokhraneva.v@mail.ru (V.A.S.); grozanv@gmail.com (N.V.G.)  
<sup>3</sup> Engelhardt Institute of Molecular Biology, Russian Academy of Sciences, 11999, Moscow, Russia; popenko@eimb.ru (V.I.P.)  
\* Correspondence: mariyabsokol@gmail.com (M.B.S.); elenanikolskaja@gmail.com (E.D.N.)

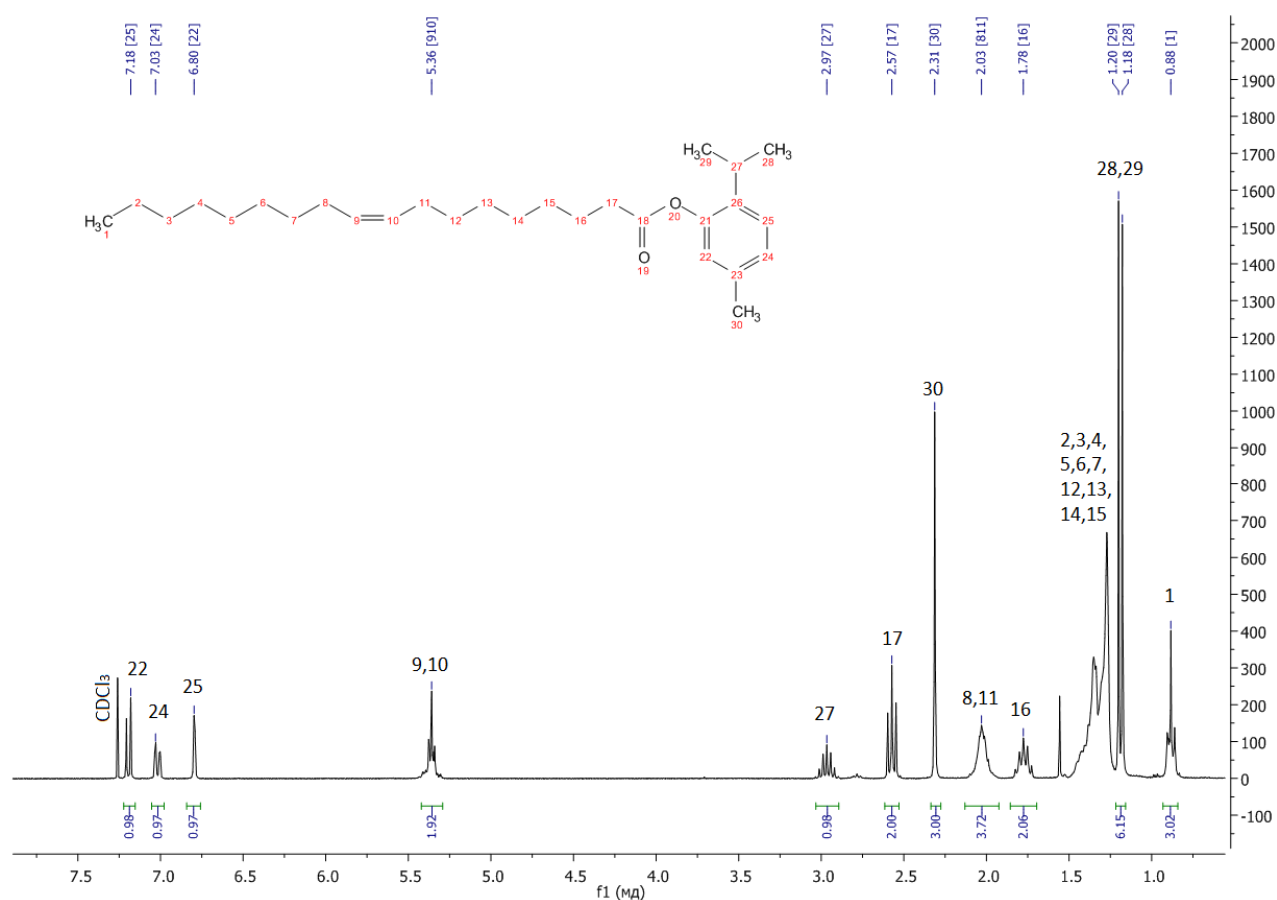

**Figure S1.** <sup>1</sup>H NMR spectrum of 2-isopropyl-5-methylphenyl oleate (TOA).

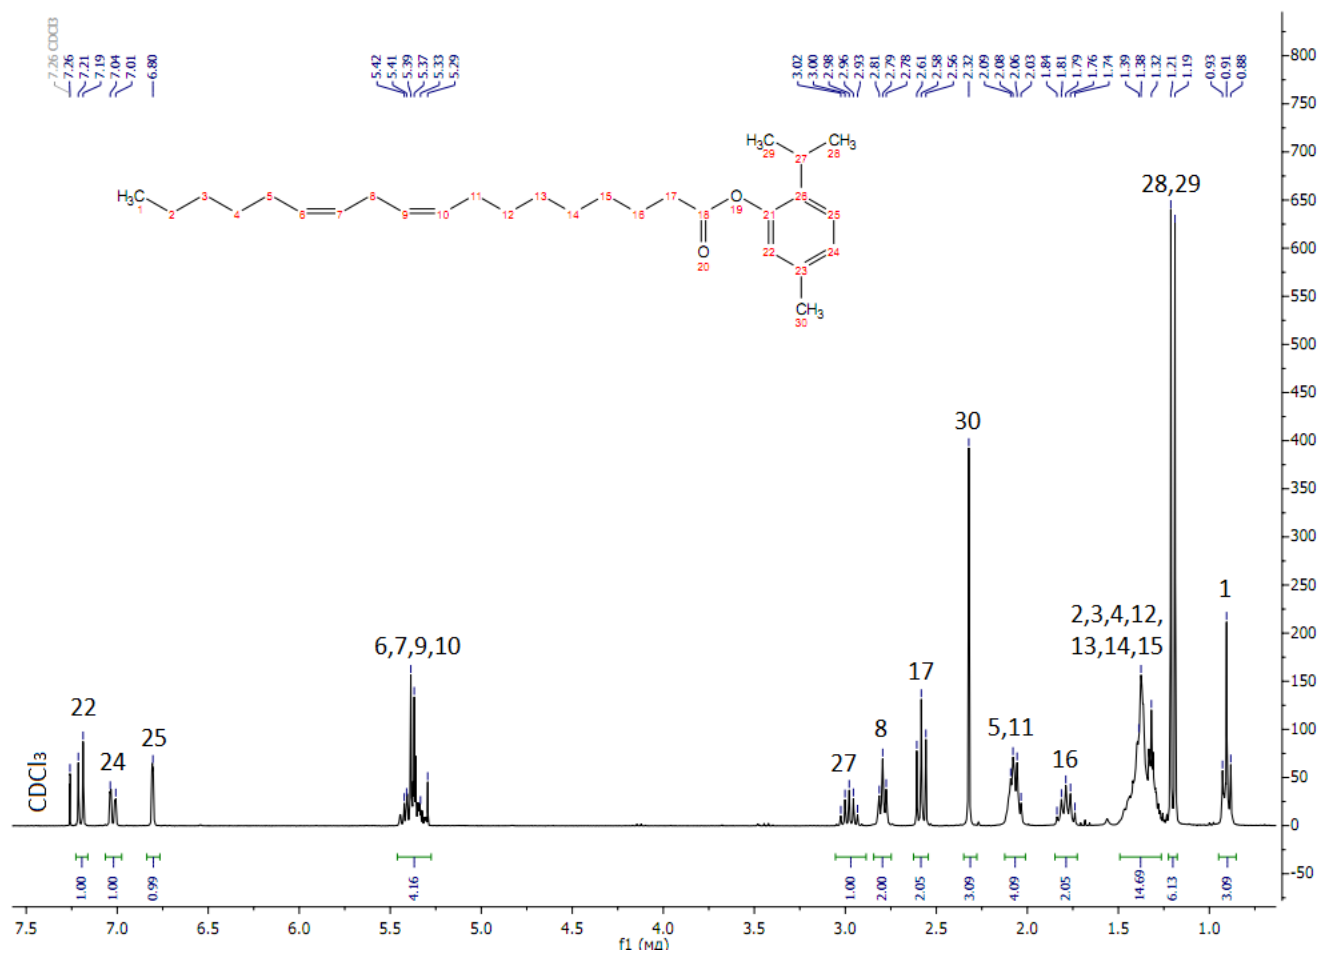

**Figure S2.** <sup>1</sup>H NMR spectrum of 2-isopropyl-5-methylphenyllinoleate (TLA).

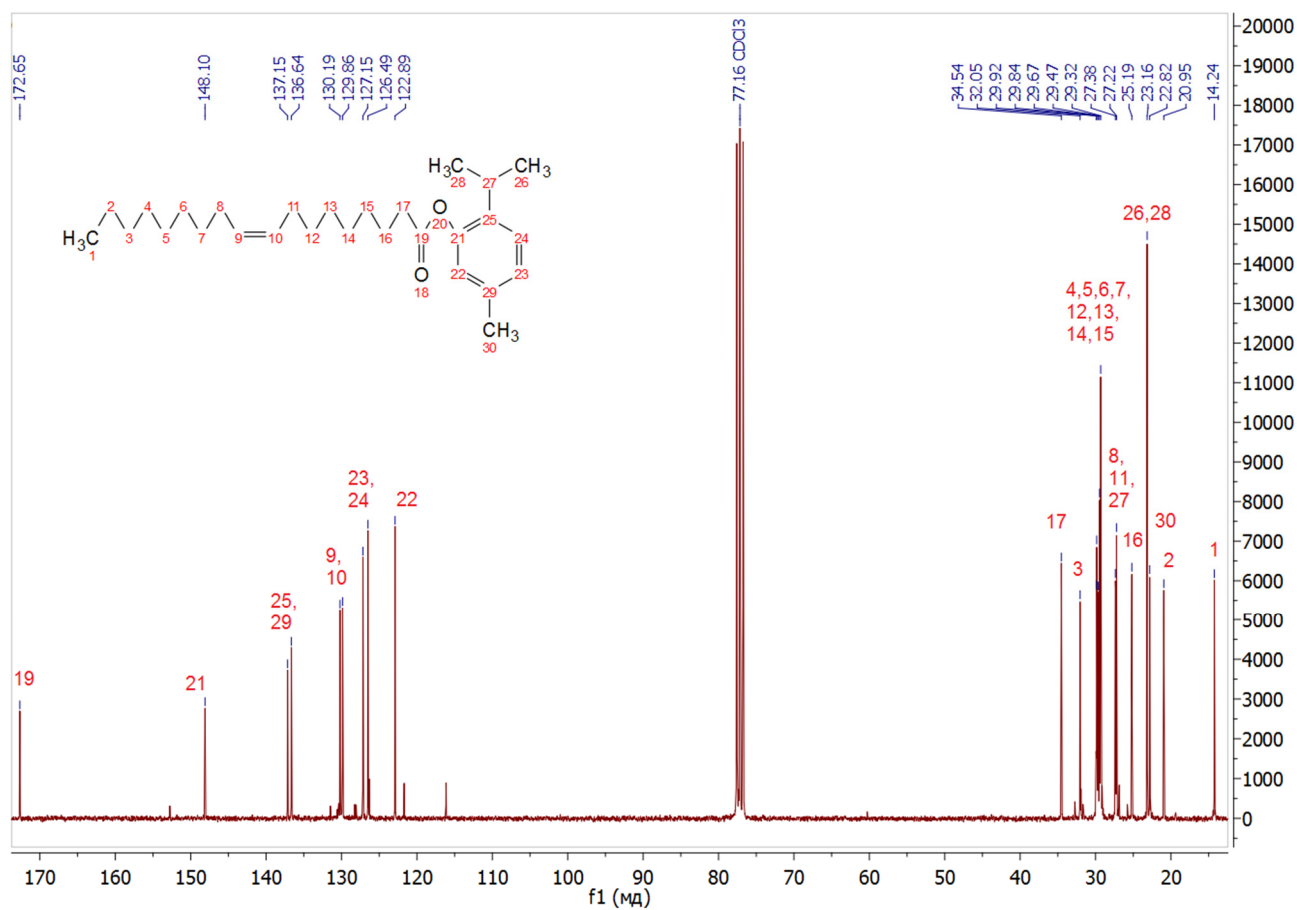

**Figure S3.** <sup>13</sup>C NMR spectrum of 2-isopropyl-5-methylphenyllinoleate (TOA).

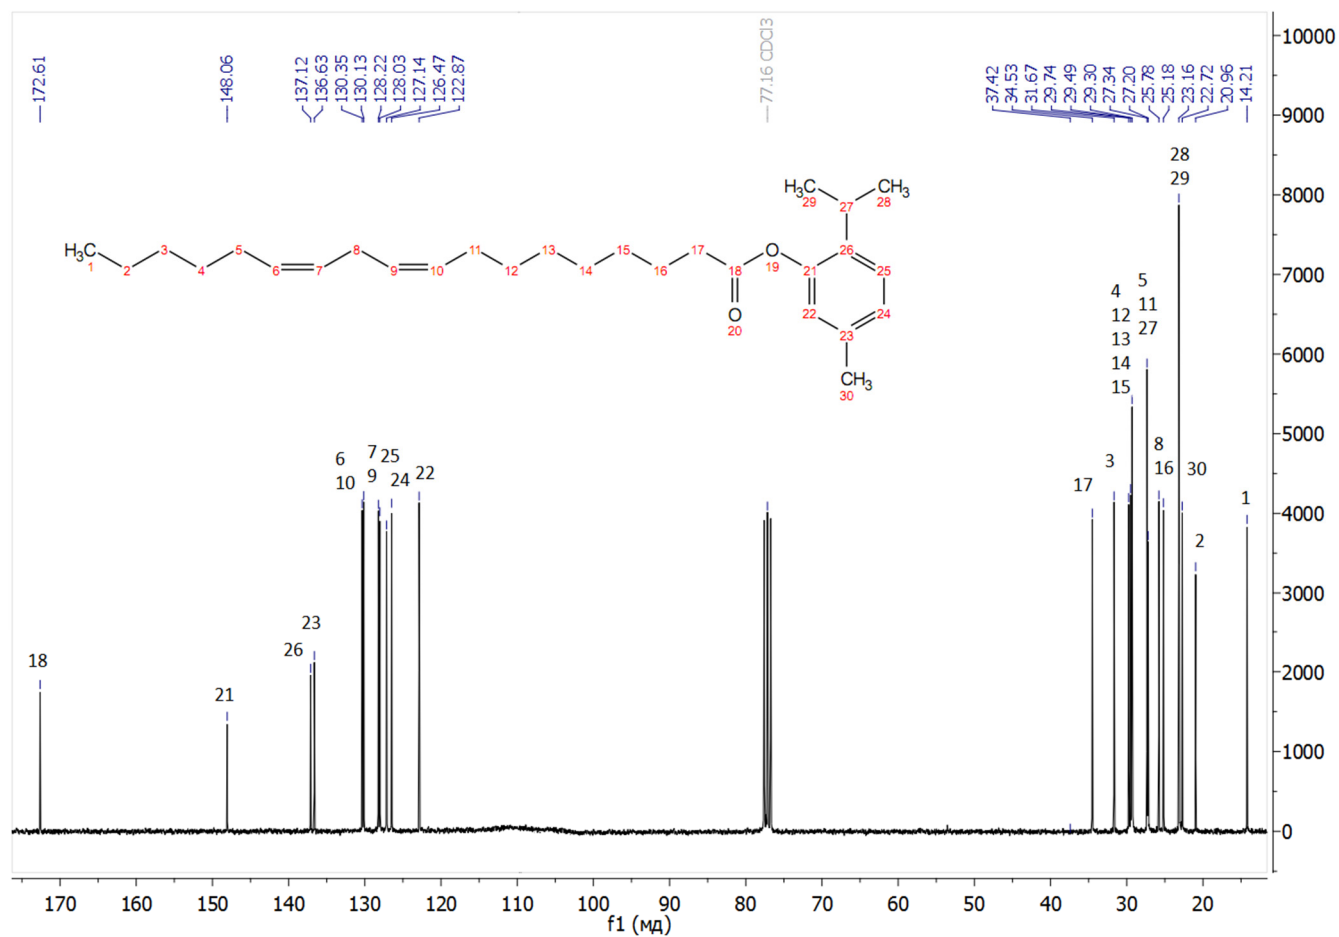

**Figure S4.** <sup>13</sup>C NMR spectrum of 2-isopropyl-5-methylphenyllinoleate (TLA).
